# Supplementary material
Source: PubMed Central journal article supplement (PMC3310425)
Supplement: supp_111.043331_043331_Supplement_data.pdf [file supp_111.043331_043331_Supplement_data.pdf]

Drug Metabolism and Disposition (DMD-2011-043331)

**Supplemental data:**

**Metabolism of [6]-Shogaol in Mice and in Cancer Cells**

Huadong Chen, Lishuang Lv, Dominique Soroka, Renauld F. Warrin, Tiffany A. Parks, Yuhui

Hu, Yingdong Zhu, Xiaoxin Chen, and Shengmin Sang

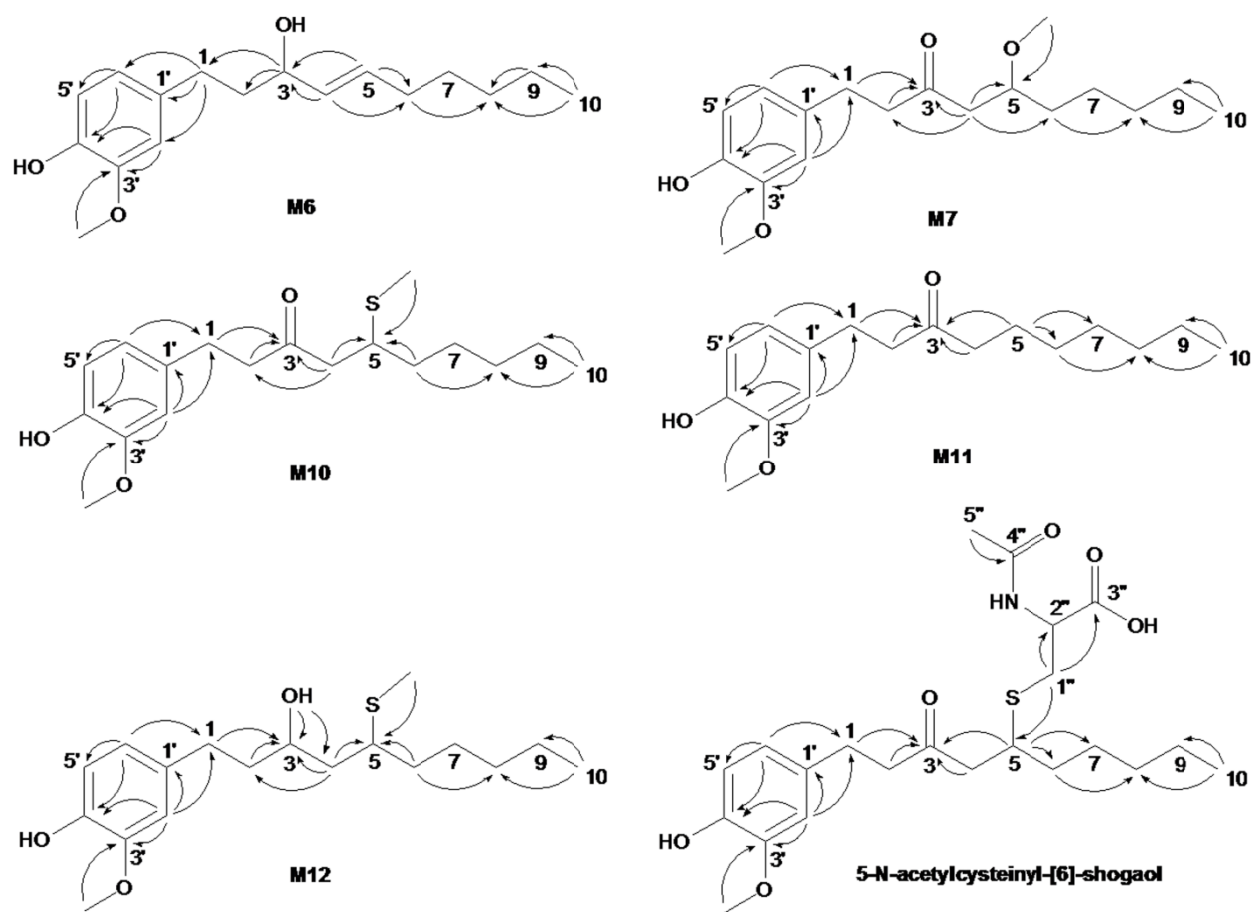

Supplementary Figure 1. Key HMBC correlations of M6, M7, M10–M12 and synthetic 5-N-acetylcysteinyl-[6]-shogaol.
